# Supplementary material
Source: Royal Society of Chemistry journal article supplement (doi:10.1039/d6tc01190j)
Supplement: d6tc01190j1.pdf [file d6tc01190j1.pdf]

## Supporting Information

### Rewritable large-area structural color films based on Mie scattering of Cu<sub>2</sub>O@SiO<sub>2</sub> microspheres

Wenbo Wu<sup>a</sup>, Tianyi Liu<sup>a</sup>, Yaqun Han<sup>a</sup>, Yue Wu<sup>\*a</sup> and Suli Wu<sup>\*a</sup>

State Key Laboratory of Fine Chemicals, Frontier Science Center for Smart  
Materials, School of Chemical Engineering, Dalian University of Technology,  
Dalian 116024, China

\* Corresponding Author Email: [wusuli@dlut.edu.cn](mailto:wusuli@dlut.edu.cn). (S. W.)

[yuewu@nimte.ac.cn](mailto:yuewu@nimte.ac.cn) (Y.W.)

Other Author E-mail: [wwb202212@163.com](mailto:wwb202212@163.com) (W.B.)

[Liutianyi@mail.dlut.edu.cn](mailto:Liutianyi@mail.dlut.edu.cn) (T.L.)

[hanyaqun2019@163.com](mailto:hanyaqun2019@163.com) (Y.H.)

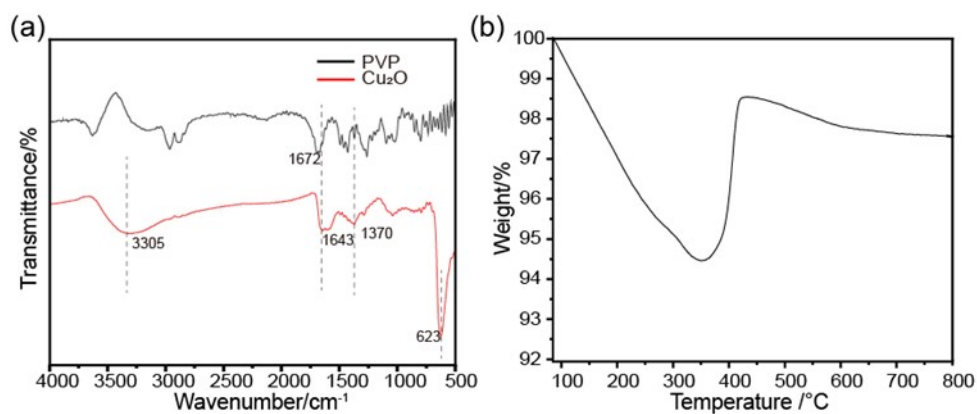

**Fig. S1** (a) FT-IR spectra of  $\text{Cu}_2\text{O}$  microspheres and PVP.(b) Thermal gravimetric curve of  $\text{Cu}_2\text{O}$  microspheres

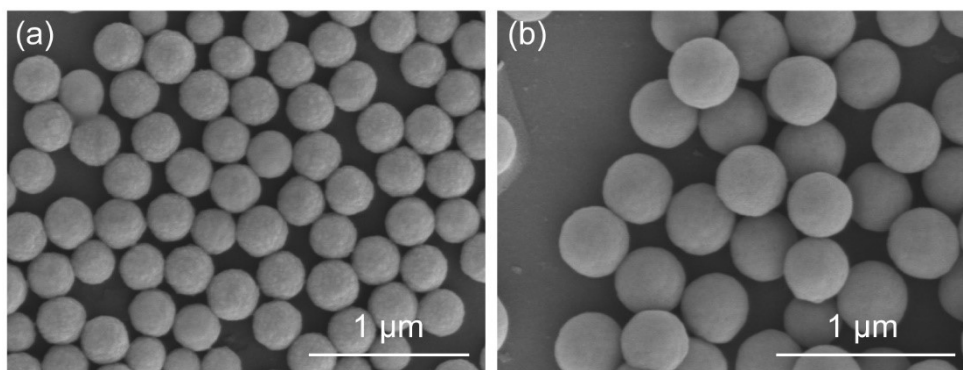

**Fig.S2** (a)  $\text{Cu}_2\text{O}$  microspheres with a diameter of 290 nm. (b)  $\text{Cu}_2\text{O}@Si\text{O}_2$  core-shell microspheres with a diameter of 398 nm

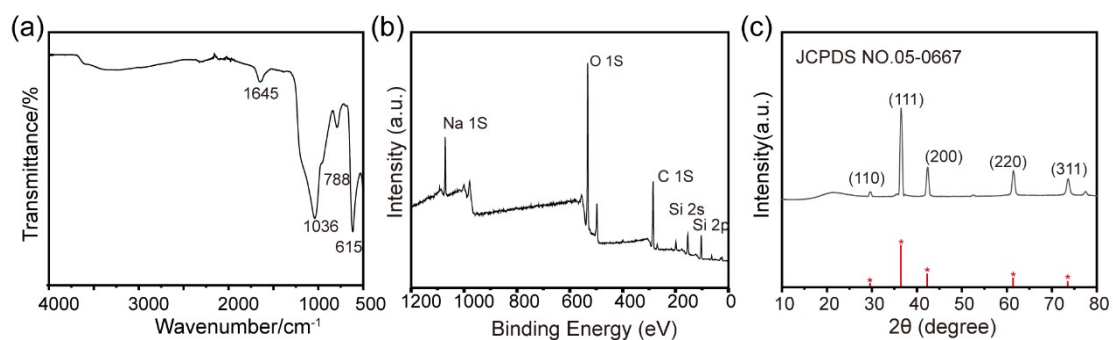

**Fig.S3** (a) FT-IR spectra, (b) XPS survey spectra, and (c) XRD patterns of  $\text{Cu}_2\text{O}@Si\text{O}_2$  core-shell microspheres

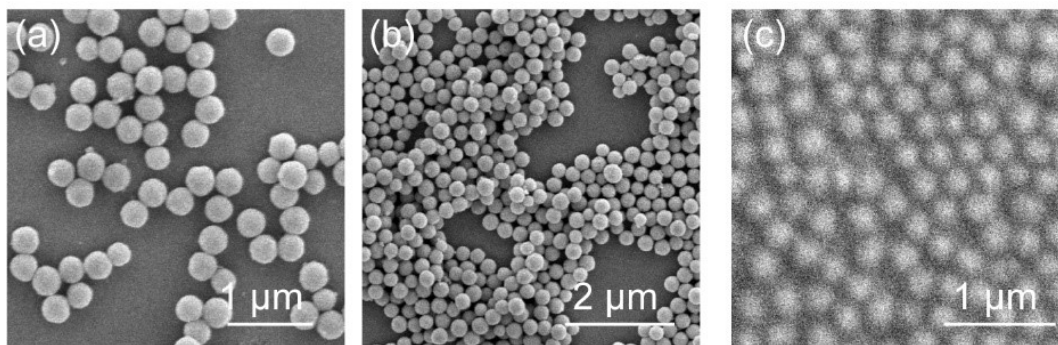

**Fig.S4** (a) SEM image of the 261 nm Cu<sub>2</sub>O@SiO<sub>2</sub> microspheres. (b) SEM image of the disordered structure prepared from the 261 nm Cu<sub>2</sub>O@SiO<sub>2</sub> microspheres. (c) SEM images of the Cu<sub>2</sub>O@SiO<sub>2</sub>/PDMS film

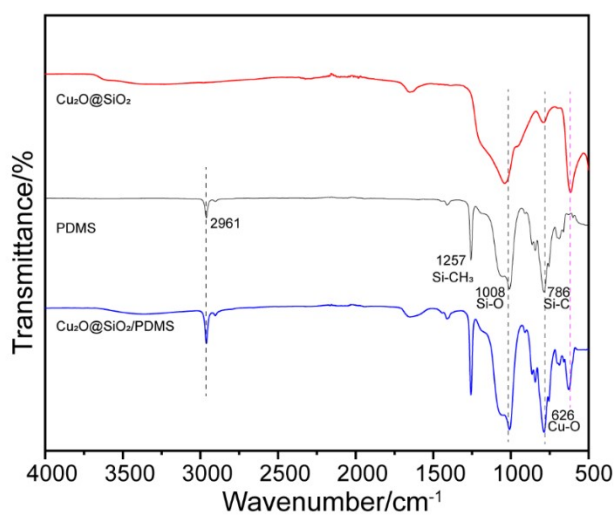

**Figure.S5** The FT-IR spectra of Cu<sub>2</sub>O@SiO<sub>2</sub>, PDMS, and Cu<sub>2</sub>O@SiO<sub>2</sub>/PDMS.

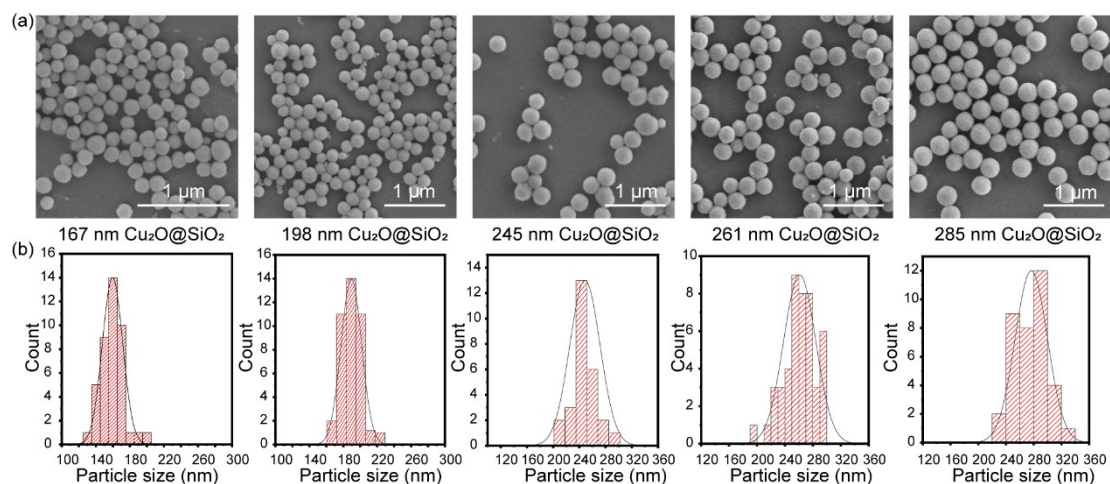

**Fig.S6** SEM images (a) and corresponding particle size distribution diagrams (b) of  $\text{Cu}_2\text{O}@/\text{SiO}_2$  nanoparticles with different particle sizes; from left to right: 167 nm, 198 nm, 245 nm, 261 nm, and 285 nm.

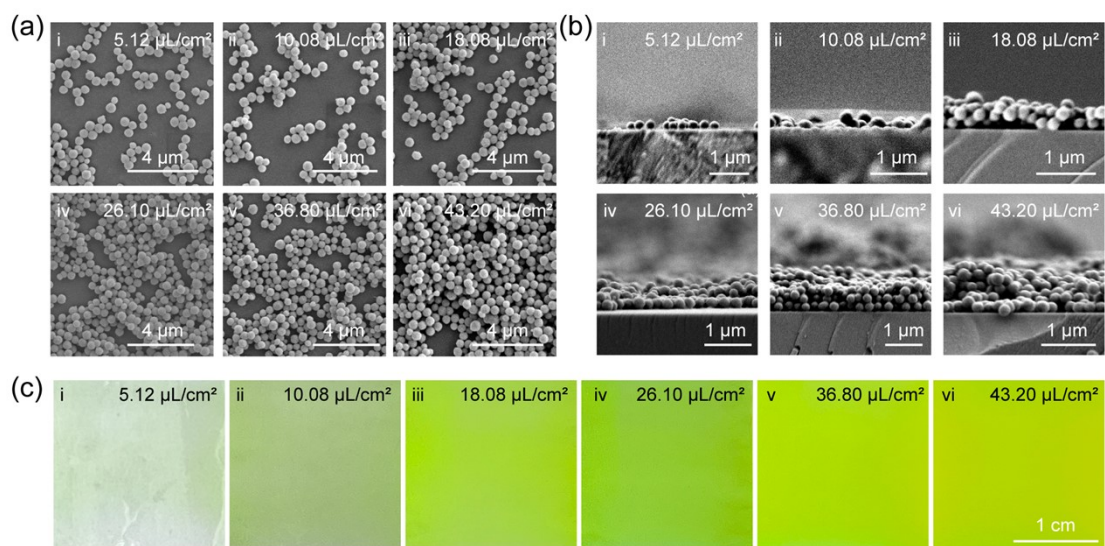

**Fig.S7** lan-view (a) and cross-sectional (b) SEM images and corresponding digital photographs (c) of  $\text{Cu}_2\text{O}@/\text{SiO}_2$  disordered structures prepared with different spraying amounts: (i) 5.12  $\mu\text{L}/\text{cm}^2$ ; (ii) 10.08  $\mu\text{L}/\text{cm}^2$ ; (iii) 18.08  $\mu\text{L}/\text{cm}^2$ ; (iv) 26.10  $\mu\text{L}/\text{cm}^2$ ; (v) 36.80  $\mu\text{L}/\text{cm}^2$ ; (vi) 43.20  $\mu\text{L}/\text{cm}^2$ .

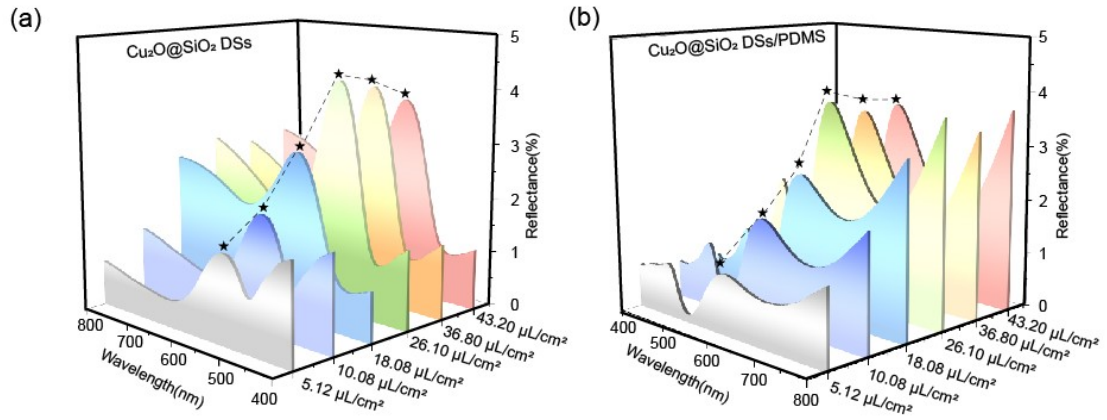

**Fig.S8** (a) Reflection spectra of disordered  $\text{Cu}_2\text{O}@/\text{SiO}_2$  structures with different spray amounts; (b) Reflection spectra of the corresponding  $\text{Cu}_2\text{O}@/\text{SiO}_2/\text{PDMS}$  films

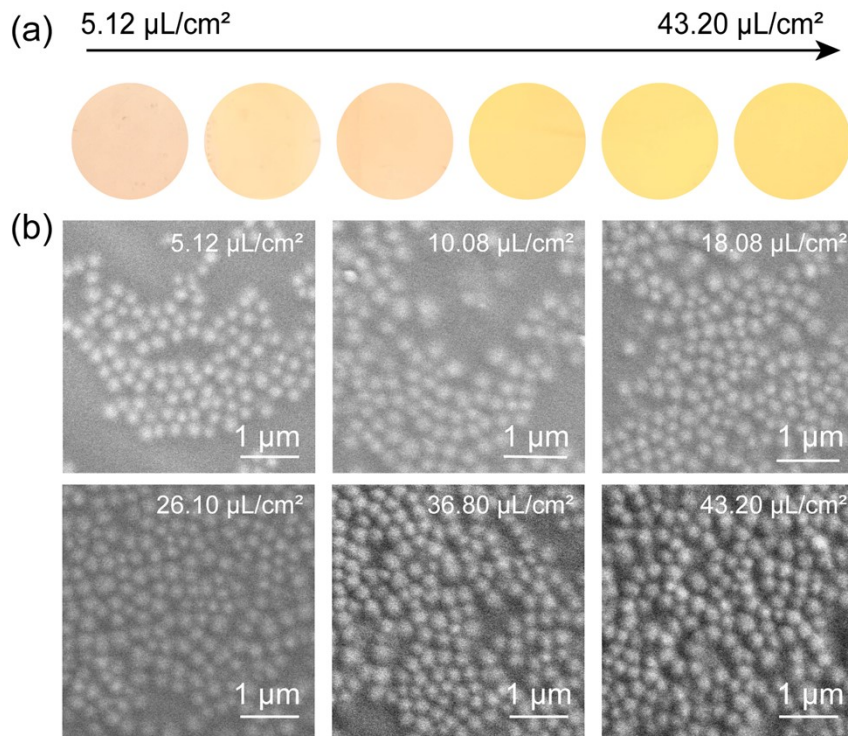

**Fig.S9** (a) Structural colors and (b) corresponding SEM images of  $\text{Cu}_2\text{O}@/\text{SiO}_2/\text{PDMS}$  films prepared with different spraying amounts.

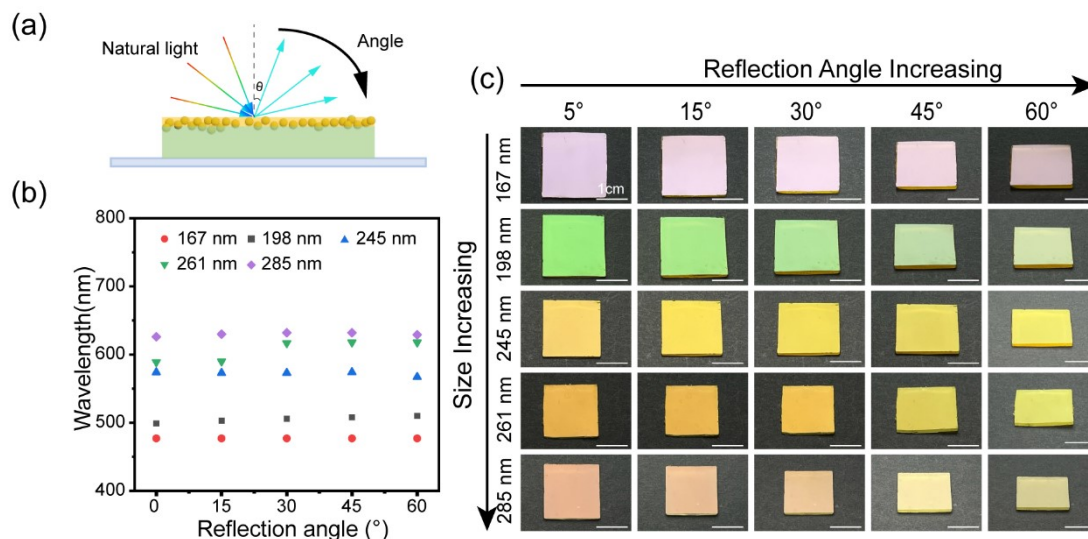

**Fig.S10** (a) Schematic diagram of the experimental setup for capturing angle-dependent structural colors, (b) Ternary relationship among reflection wavelength, particle size, and reflection angle, (c) Digital photographs of the colored films assembled from  $\text{Cu}_2\text{O}@\text{SiO}_2$  particles of different sizes, viewed from various reflection angles. The scale bar in all digital photographs is 1 cm.

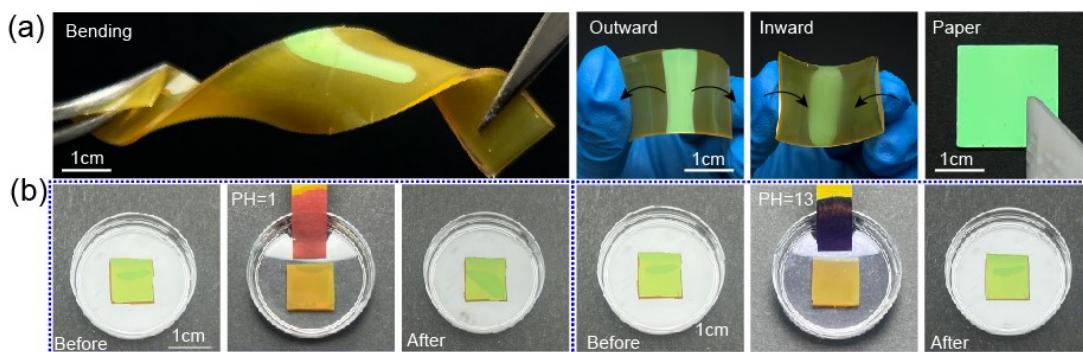

**Fig.S11** (a) Digital photographs of the  $\text{Cu}_2\text{O}@\text{SiO}_2/\text{PDMS}$  film during bending, folding, wiping, and acid/alkali resistance tests (b)

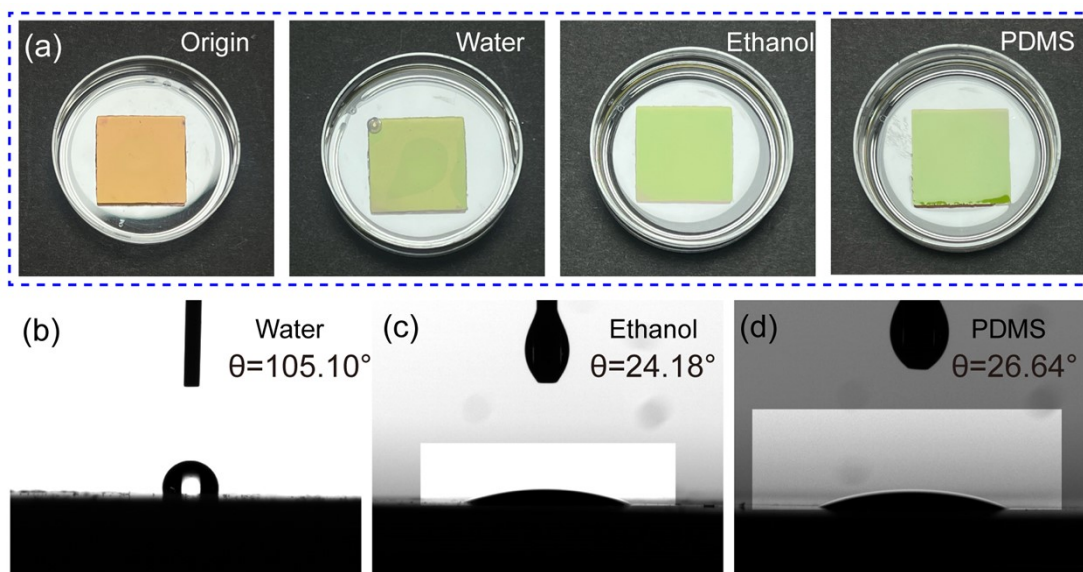

**Fig.S12** Universality of the covering liquid: (a) Digital photographs of writing on  $\text{Cu}_2\text{O}@/\text{SiO}_2/\text{PDMS}$  films using water, ethanol, and silicone oil; (b) Contact angle of water; (c) Contact angle of ethanol; (d) Contact angle of silicone oil.

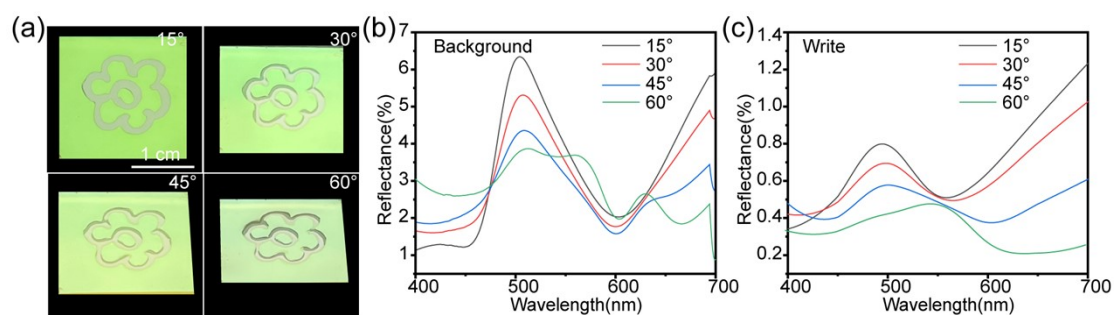

**Fig.S13** Angle-dependent properties of the written patterns on the  $\text{Cu}_2\text{O}@/\text{SiO}_2/\text{PDMS}$  film: (a) Digital photographs of the written marks captured at different viewing angles; (b) Reflectance spectra of the background and (c) the written pattern observed at various angles.

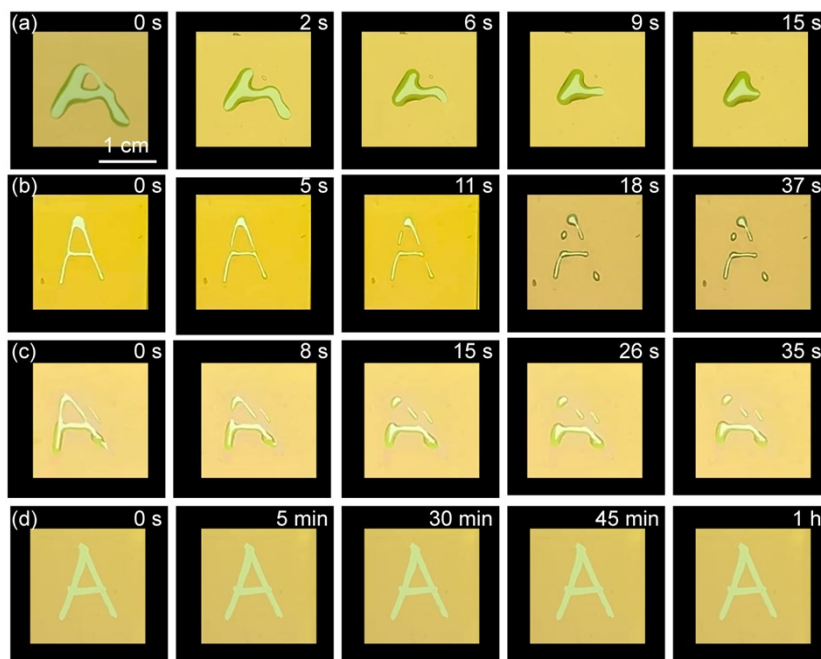

**Fig.S14** Residence time of different liquids written on the  $\text{Cu}_2\text{O}@\text{SiO}_2/\text{PDMS}$  film: (a) ethanol; (b) peanut oil; (c) mineral oil; (d) silicone oil
